# Supplementary material
Source: Springer Nature journal article supplement (https://www.springermedizin.de/resource/supplementary/12885_2011_2988_MOESM3_ESM.pdf/9462468)

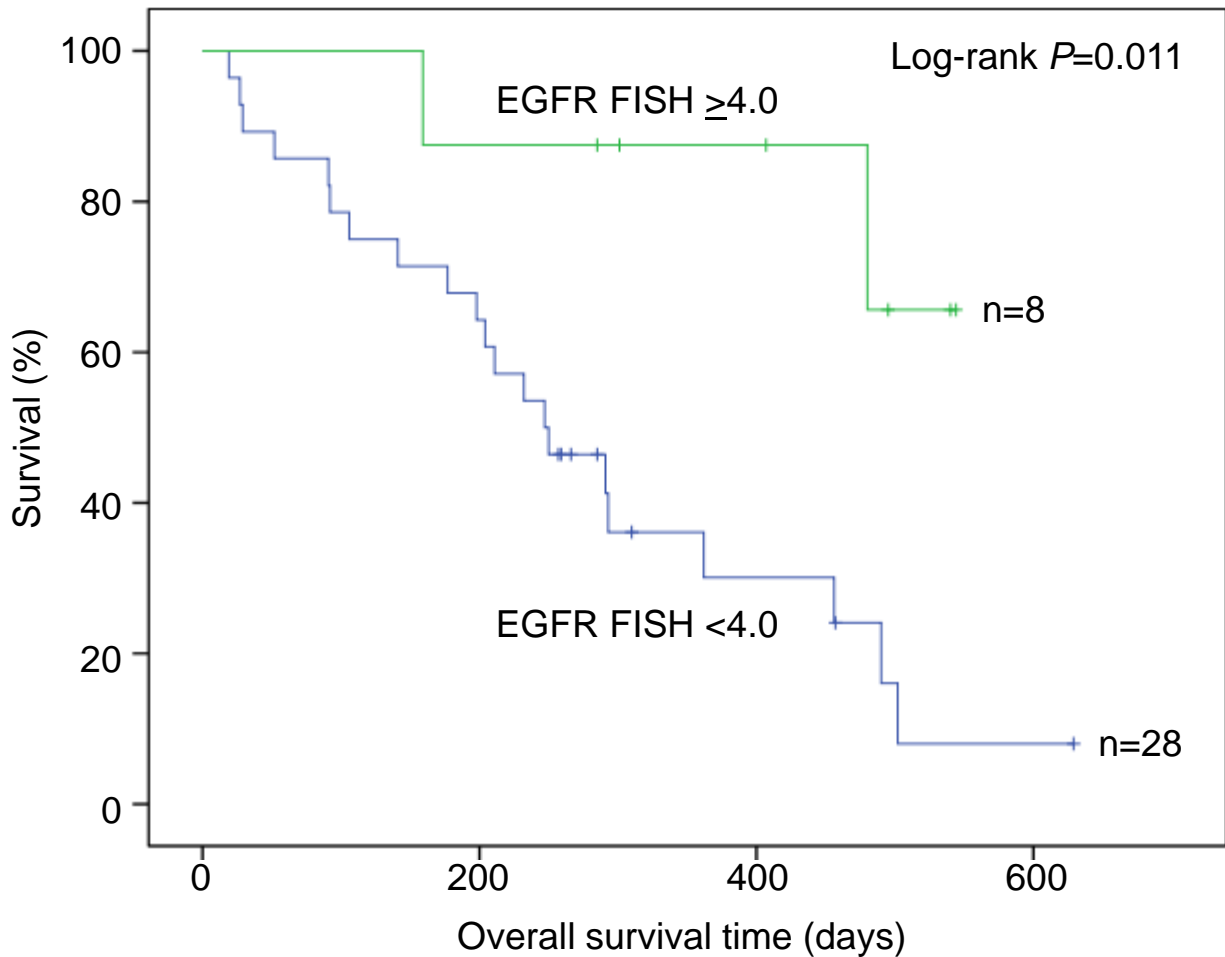

Supplement: MOESM3 [file 9462468]
